# Supplementary material for: Patient and Family Representation in Randomized Clinical Trials Published in 3 Medical and Surgical Journals: A Systematic Review
Source: PubMed Central journal article supplement (PMC9463605; doi:10.1001/jamanetworkopen.2022.30858), 2022-09-09
Supplement: jamanetwopen-e2230858-s001.pdf [file jamanetwopen-e2230858-s001.pdf]

## Supplementary Online Content

Benizri N, Hallot S, Burns K, Goldfarb M. Patient and family representation in randomized clinical trials published in 3 medical and surgical journals: a systematic review. *JAMA Netw Open*. 2022;5(9):e2230858.  
doi:10.1001/jamanetworkopen.2022.30858

### **eTable.** Randomized Clinical Trial Subject Areas and Frequency

This supplementary material has been provided by the authors to give readers additional information about their work.

**eTable.** Randomized Clinical Trial Subject Areas and Frequency

| <b>Subject areas</b>                  | <b>Studies (N=; %)</b> |
|---------------------------------------|------------------------|
| General surgery                       | 31 (21%)               |
| COVID-19                              | 26 (17%)               |
| Medical oncology                      | 15 (10%)               |
| Cardiovascular                        | 13 (9%)                |
| Neurological                          | 10 (7%)                |
| Infection                             | 9 (6%)                 |
| Rheumatological                       | 6 (4%)                 |
| Psychiatry/ Psychology                | 6 (4%)                 |
| Hematology                            | 5 (3%)                 |
| Respiratory disease                   | 5 (3%)                 |
| Nephrology                            | 4 (3%)                 |
| Gastroenterology                      | 4 (3%)                 |
| Obesity                               | 4 (3%)                 |
| Endocrinology                         | 3 (2%)                 |
| Dermatology                           | 3 (2%)                 |
| Obstetrics/Gynecology                 | 2 (1%)                 |
| Vascular Surgery                      | 2 (1%)                 |
| Public health and Preventive Medicine | 2 (1%)                 |
